# Supplementary material for: Chalcone derivatives' interaction with human serum albumin and cyclooxygenase-2
Source: Royal Society of Chemistry journal article supplement (doi:10.1039/d3ra07438b), 2024-01-01
Supplement: d3ra07438b1.pdf [file d3ra07438b1.pdf]

## **Supporting Information**

### **Chalcone derivatives binding with human serum albumin and cyclooxygenase-2**

Subramani Karthikeyan<sup>a\*</sup>, Shanmugavel Chinnathambi<sup>b\*</sup>, Ayyavu Thirunarayanan<sup>c</sup>,  
Leon Bernet Shano<sup>d</sup>, Arasappan Hemamalini<sup>e</sup>, Anandh Sundaramoorthy<sup>f</sup>, Rajendiran  
Mangaiyarkarasi<sup>g</sup>, Norhidayah Abu<sup>h</sup>, Singaravelu Ganesan<sup>f</sup>, Ganesh N. Pandian<sup>h\*</sup>

<sup>a</sup>Centre for Healthcare Advancement, Innovation and Research, Vellore Institute of  
Technology, Chennai, 600 127, India

<sup>b</sup>Institute for Integrated Cell-Material Sciences, Institute for Advanced Study, Kyoto  
University, Kyoto, 616-8510 Japan

<sup>c</sup>Department of Chemical Engineering Biotechnology and Materials, FCFM, University of  
Chile, Av. Beauchef 851, Santiago, Chile

<sup>d</sup>Division of Physics, School of Advanced Sciences, Vellore Institute of Technology (VIT)  
Chennai campus, Vandalur-Kelambakkam Road, Tamil Nadu 600127, India

<sup>e</sup>Department of Chemistry, Government College of Engineering Srirangam, Sethurapatti,  
Thiruchirappalli, Tamil Nadu, India

<sup>f</sup>Department of Medical Physics, Anna University, Chennai-600 025, India.

<sup>g</sup>Centre for Nanotechnology Research, Vellore Institute of Technology, Vellore, Tamil Nadu,  
India

<sup>h</sup>Department of Medical Microbiology & Parasitology, School of Medical Sciences,  
Universiti Sains Malaysia, Health Campus, Kubang Kerian 16150, Kelantan, Malaysia

Corresponding email address:

s.karthikeyan@vit.ac.in

chinnathambi.shanmugavel.8s@kyoto-u.ac.jp

namasivayam.ganeshpandian.5z@kyoto-u.ac.jp

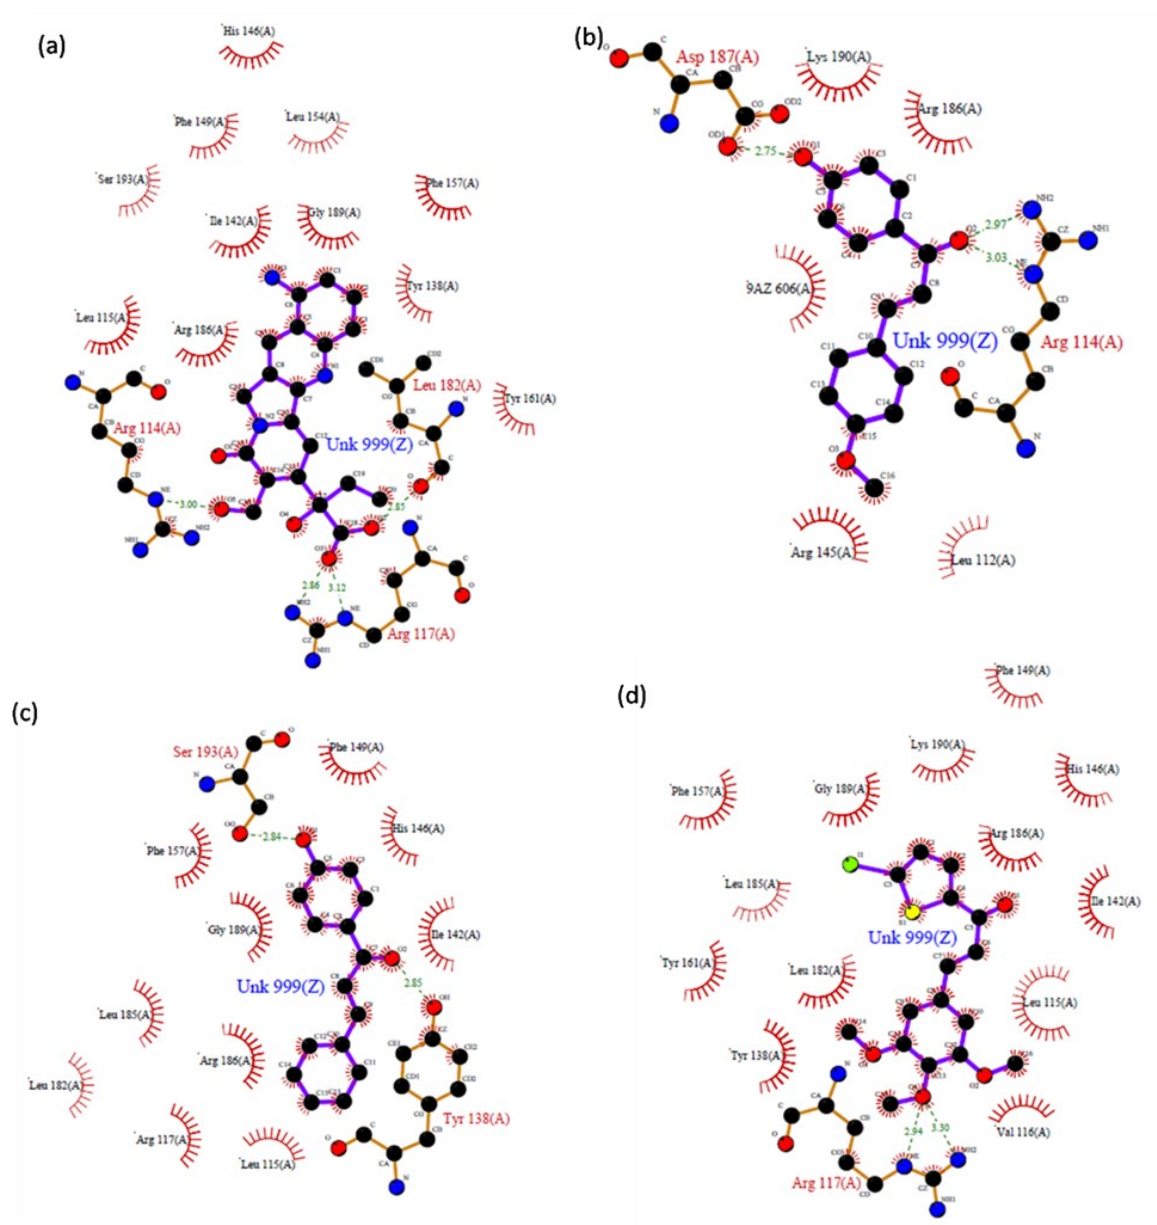

**Figure.S1** shows the 2D ligand plot in HSA binding site (a) co-crystal site (b) compound A (c) compound B (d) compound C.



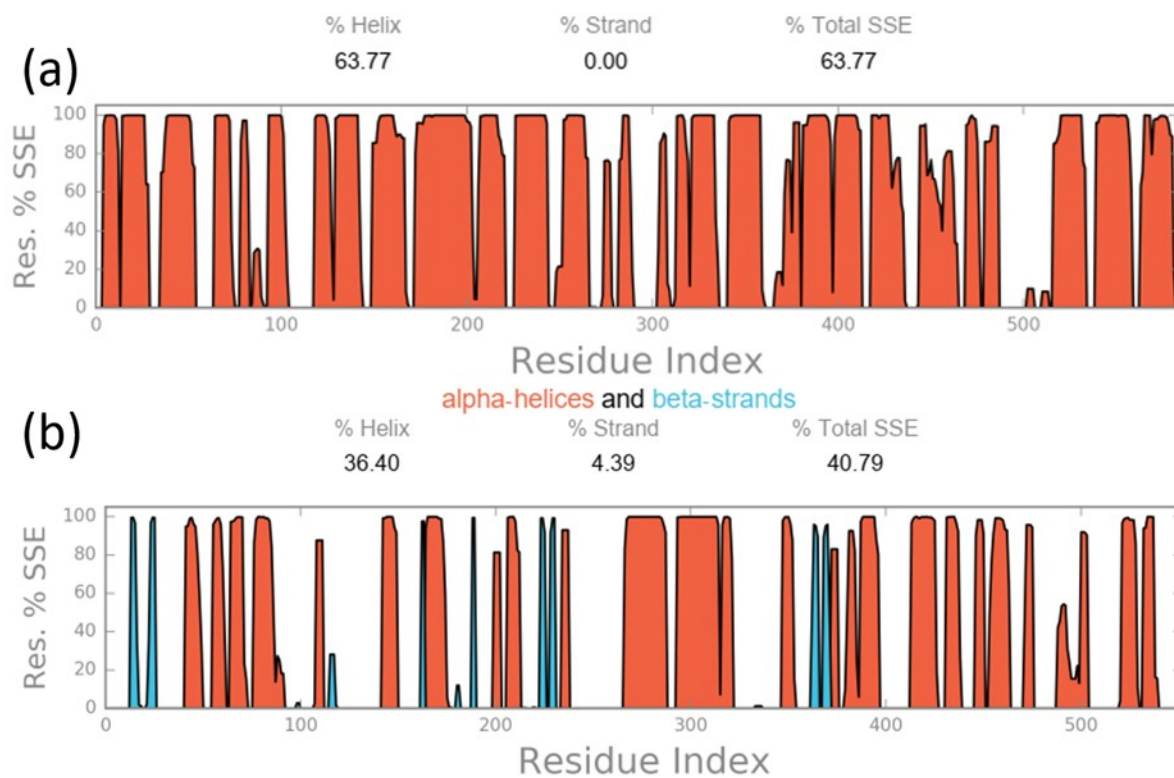

**Figure.S3** Protein secondary structure elements analysis plot of compound C in (a) HSA (b) COX-2 complex system.

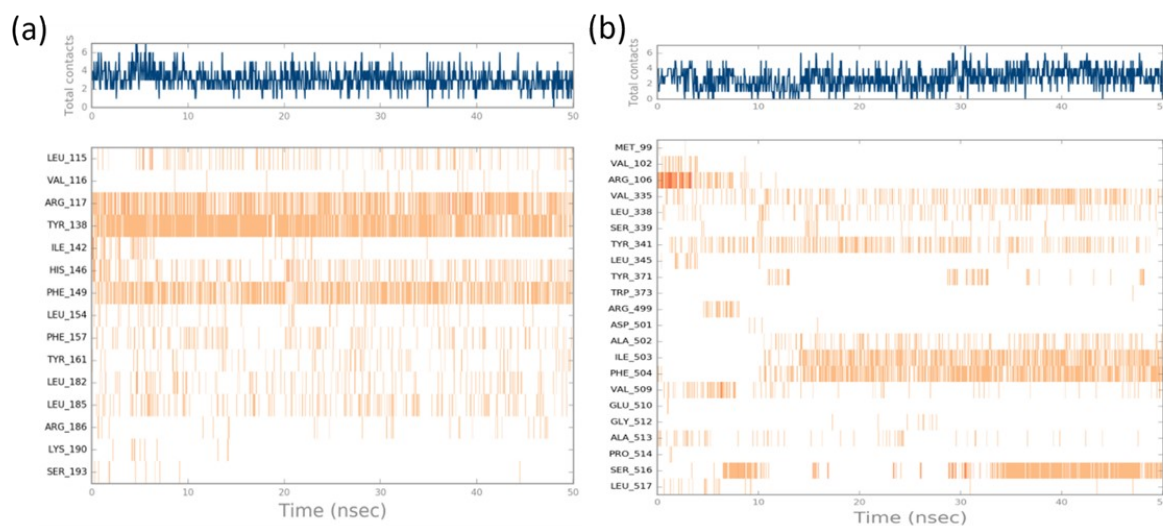

**Figure.S4** Total contacts of compound C in (a) HSA (b) COX-2 complex system.

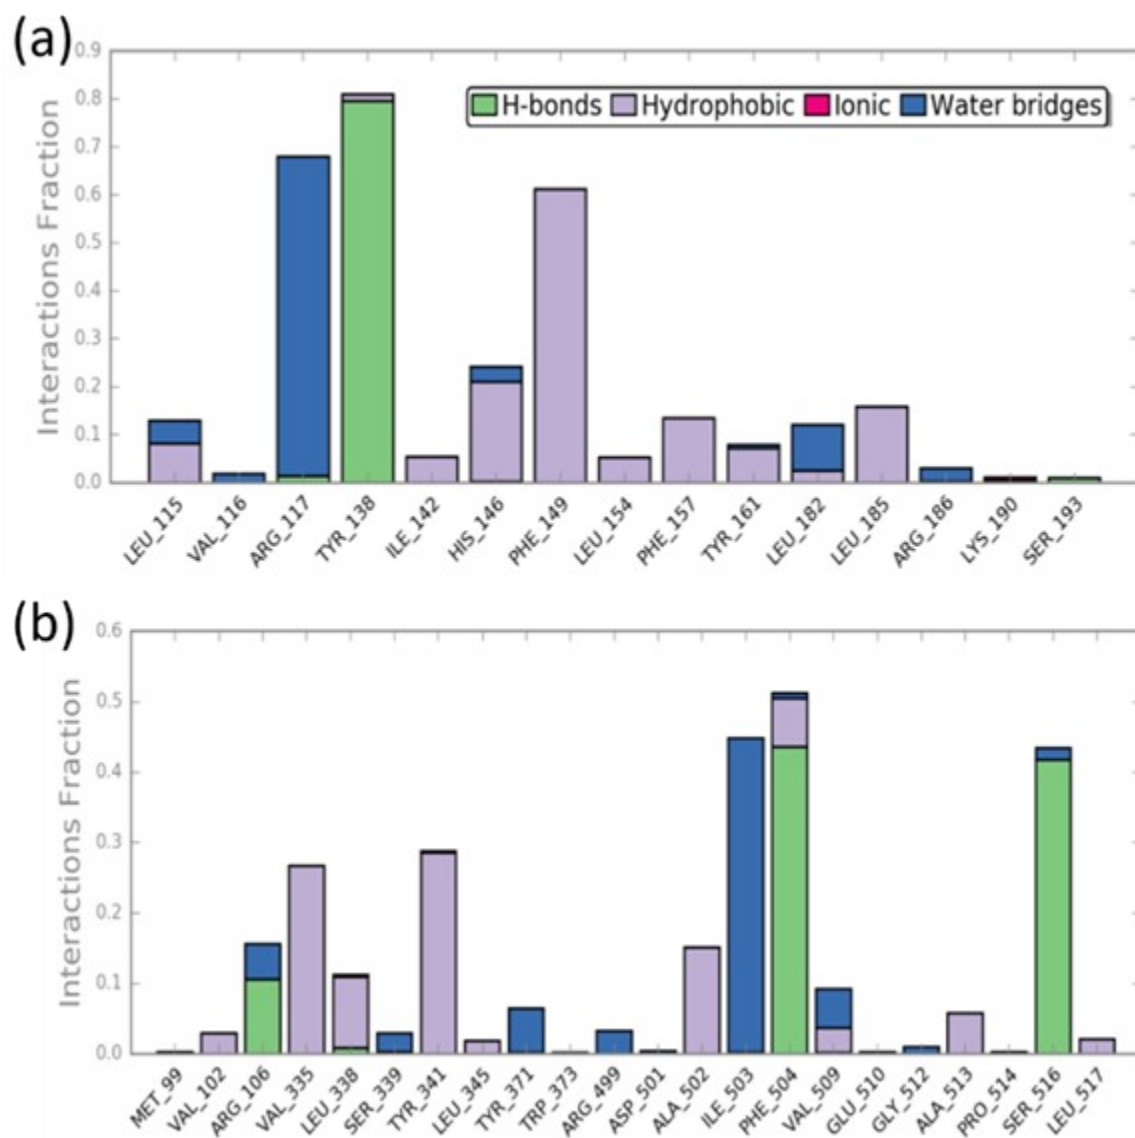

**Figure.S5** Protein-ligand interaction fraction plot of compound C in (a) HSA (b) COX-2 complex system.

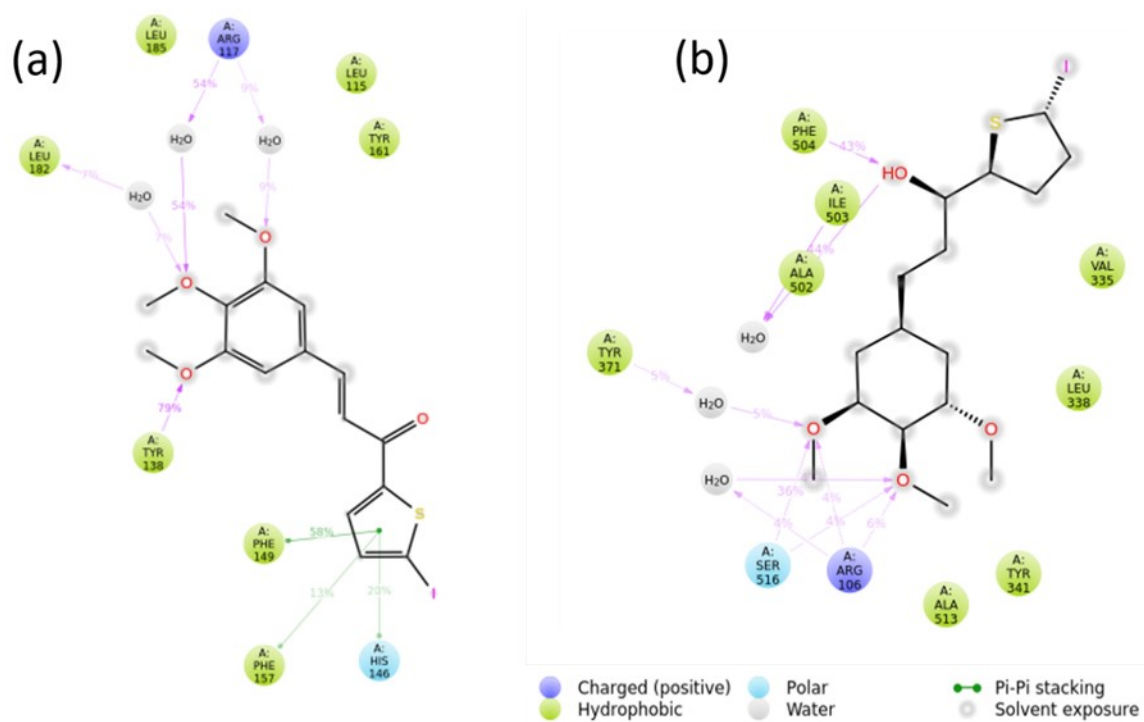

**Figure.S6** shows MD ligand plot of compound C in (a) HSA (b) COX-2 complex system.

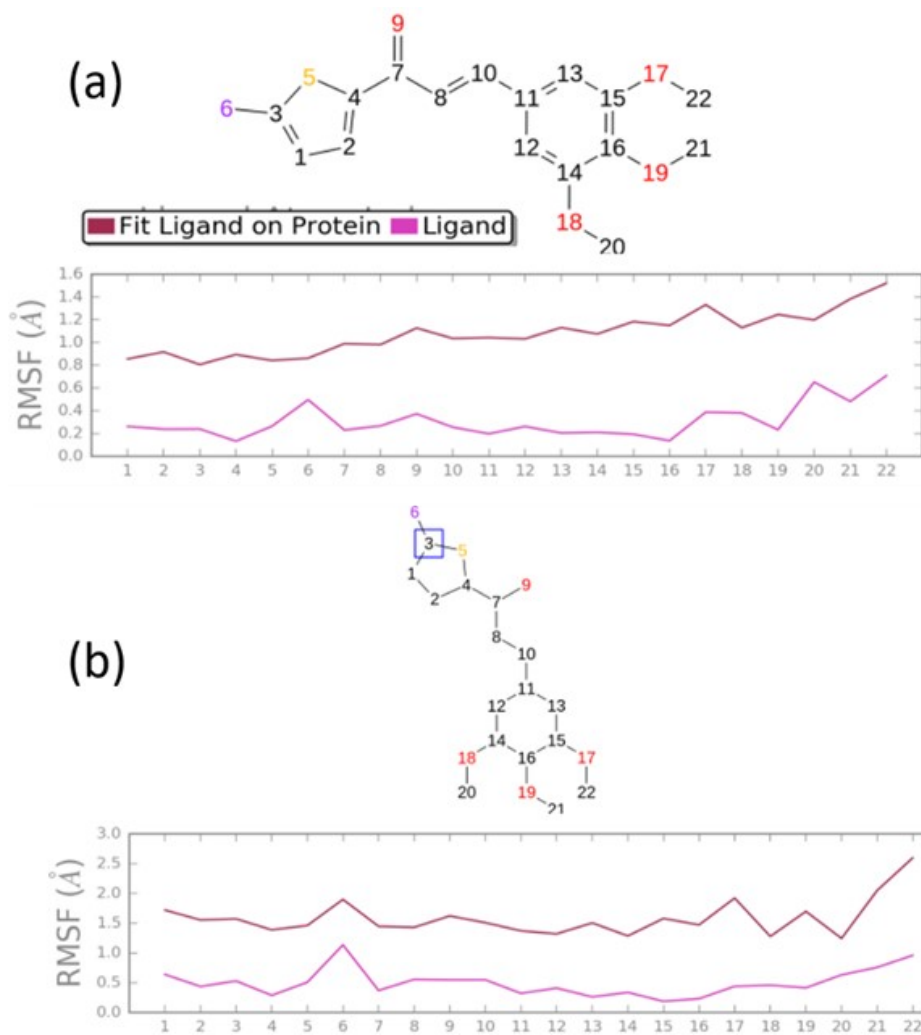

**Figure.S7** shows Ligand RMSF plot of compound C in (a) HSA (b) COX-2 complex system.

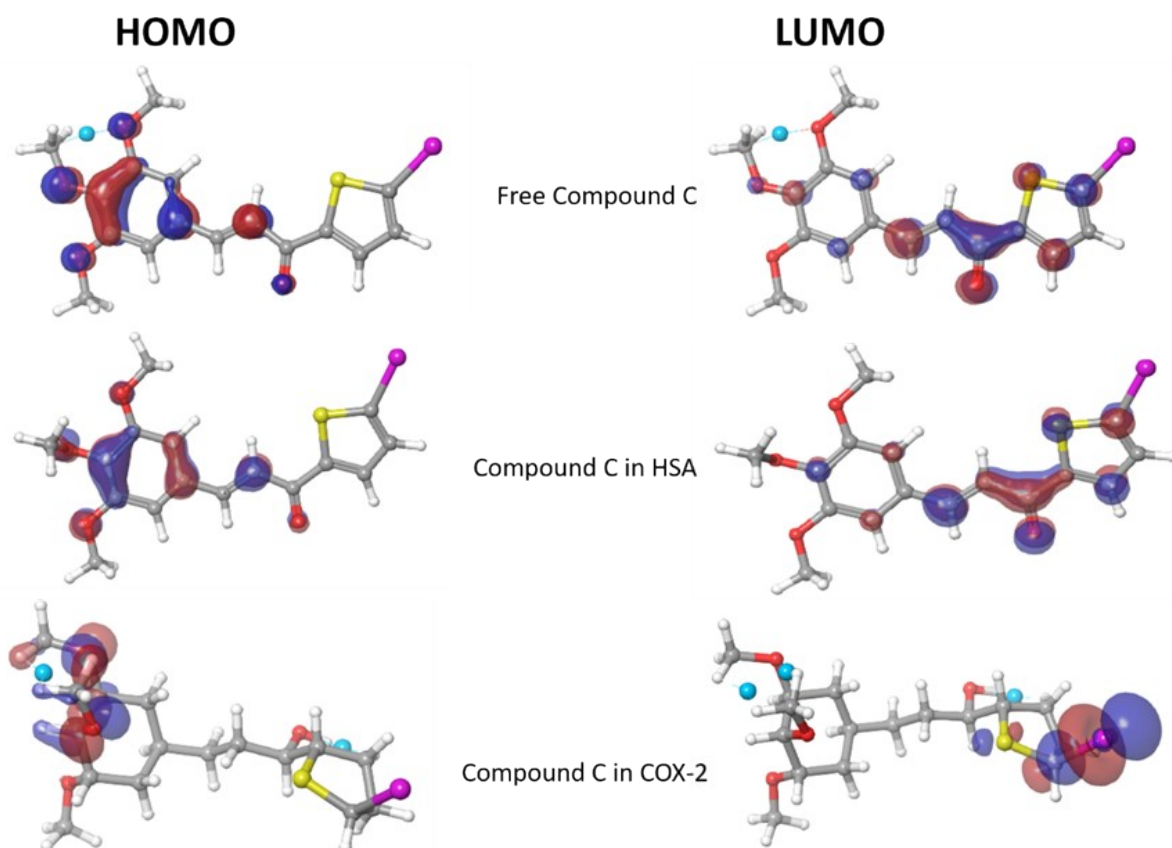

**Figure.S8** HOMO-LUMO plot of free compound C and compound C in HSA and COX-2 binding environment.

**Table S1.** HOMO-LUMO parameters of free compound C and compound C in HSA and COX-2 binding environment.

| <b>DFT Globalised Parameter</b>          | <b>Compound C</b> | <b>Compound C in HSA</b> | <b>Compound C in COX-2</b> |
|------------------------------------------|-------------------|--------------------------|----------------------------|
| HOMO (Hartree)                           | -0.192037         | -0.211642                | -0.214717                  |
| LUMO (Hartree)                           | -0.073375         | -0.078166                | -0.037280                  |
| ALIE (kcal/mol)                          | 200.77            | 196.918                  | 182.579                    |
| ESP                                      | -32.63            | -32.29                   | -33.42                     |
| Interaction Strength ( $e^-/a_0^{**3}$ ) | -0.05             | -0.05                    | -0.05                      |
